# Supplementary material
Source: PubMed Central journal article supplement (PMC7301305)
Supplement: jamapsychiatry-e201586-s001.pdf [file jamapsychiatry-e201586-s001.pdf]

## Supplementary Online Content

Doupnik SK, Rudd B, Schmutte T, et al. Association of suicide prevention interventions with subsequent suicide attempts, linkage to follow-up care, and depression symptoms for acute care settings. *JAMA Psychiatry*. Published online June 17, 2020.  
doi:10.1001/jamapsychiatry.2020.1586

**eTable 1.** Complete search strategy for Ovid/Medline

**eTable 2.** Risk of Bias Assessment

**eTable 3.** Values used to calculate estimates of effect size

**eReferences.**

This supplementary material has been provided by the authors to give readers additional information about their work.

**eTable 1.** Complete search strategy for Ovid/Medline

| #  | Searches                                                                                                                                                                                                                                                                                                                                                                                        | Results |
|----|-------------------------------------------------------------------------------------------------------------------------------------------------------------------------------------------------------------------------------------------------------------------------------------------------------------------------------------------------------------------------------------------------|---------|
| 1  | preven*.mp. or exp primary prevention/ or exp secondary prevention/                                                                                                                                                                                                                                                                                                                             | 2193468 |
| 2  | suicide/ or suicidal ideation/ or suicide, attempted/                                                                                                                                                                                                                                                                                                                                           | 55929   |
| 3  | exp Self-Injurious Behavior/                                                                                                                                                                                                                                                                                                                                                                    | 68697   |
| 4  | (behaviors self-destructive or behaviors self-injurious or deliberate self harm or suicide or suicides).mp. [mp=title, abstract, original title, name of substance word, subject heading word, floating sub-heading word, keyword heading word, organism supplementary concept word, protocol supplementary concept word, rare disease supplementary concept word, unique identifier, synonyms] | 75656   |
| 5  | 2 or 3 or 4                                                                                                                                                                                                                                                                                                                                                                                     | 84078   |
| 6  | 1 and 5                                                                                                                                                                                                                                                                                                                                                                                         | 19544   |
| 7  | exp clinical trial/                                                                                                                                                                                                                                                                                                                                                                             | 846661  |
| 8  | clinical trial.ti,ab.                                                                                                                                                                                                                                                                                                                                                                           | 112871  |
| 9  | 7 or 8                                                                                                                                                                                                                                                                                                                                                                                          | 895792  |
| 10 | 6 and 9                                                                                                                                                                                                                                                                                                                                                                                         | 664     |
| 11 | limit 10 to yr="2000 -Current"                                                                                                                                                                                                                                                                                                                                                                  | 563     |
| 12 | limit 11 to english language                                                                                                                                                                                                                                                                                                                                                                    | 539     |

(preven\*.mp. or exp primary prevention/ or exp secondary prevention/) AND (suicide/ or suicidal ideation/ or suicide, attempted/) OR (exp Self-Injurious Behavior/) OR (behaviors self-destructive or behaviors self-injurious or deliberate self harm or suicide or suicides).mp. [mp=title, abstract, original title, name of substance word, subject heading word, floating sub-heading word, keyword heading word, organism supplementary concept word, protocol supplementary concept word, rare disease supplementary concept word, unique identifier, synonyms] AND (exp clinical trial/) OR (clinical trial.ti,ab.) AND (limit 10 to yr="2000 -Current") AND (limit to english language)

Note: Search completed on December 31, 2019

**eTable 2. Risk of Bias Assessment**

| Author and Year                | Random sequence generation | Allocation concealment | Selective reporting | Other bias          | Blinding of participants and personnel | Blinding of outcome assessment | Incomplete outcome data |
|--------------------------------|----------------------------|------------------------|---------------------|---------------------|----------------------------------------|--------------------------------|-------------------------|
| Armitage 2016 <sup>1</sup>     | low                        | low                    | low                 | low                 | high                                   | low                            | medium                  |
| Asarnow 2011 <sup>2</sup>      | low                        | low                    | low                 | low                 | high                                   | low                            | medium                  |
| Bryan 2017 <sup>3</sup>        | low                        | medium                 | medium              | low                 | medium                                 | low                            | high                    |
| Comtois 2019 <sup>4</sup>      | low                        | low                    | low                 | medium <sup>a</sup> | medium                                 | low                            | medium                  |
| Currier 2010 <sup>5</sup>      | medium                     | low                    | low                 | low                 | medium                                 | low                            | medium                  |
| Grupp-Phelan 2019 <sup>6</sup> | low                        | low                    | low                 | low                 | medium                                 | low                            | high                    |
| Grupp-Phelan 2012 <sup>7</sup> | low                        | low                    | low                 | medium <sup>b</sup> | medium                                 | low                            | high                    |
| King 2015 <sup>8</sup>         | low                        | low                    | low                 | low                 | medium                                 | medium                         | high                    |
| Miller 2017 <sup>9</sup>       | high                       | high                   | low                 | low                 | medium                                 | low                            | high                    |
| O'Connor 2018 <sup>10</sup>    | medium                     | high                   | low                 | high <sup>c</sup>   | medium                                 | medium                         | medium                  |
| Ougrin 2011 <sup>11</sup>      | low                        | low                    | low                 | low                 | high                                   | low                            | medium                  |
| Spirito 2002 <sup>12</sup>     | medium                     | medium                 | medium              | low                 | medium                                 | medium                         | high                    |
| Stanley 2015 <sup>13</sup>     | high                       | high                   | low                 | high <sup>d</sup>   | medium                                 | low                            | low                     |
| Stanley 2018 <sup>14</sup>     | medium                     | medium                 | low                 | high <sup>e</sup>   | medium                                 | low                            | low                     |

a. Source of other bias for Comtois 2019: analysis plan and protocol changed during the study

b. Source of other bias for Grupp-Phelan 2012: High nonparticipation rate

c. Source of other bias for O'Connor 2018: Limited information was provided about inclusion criteria therefore other bias may have been introduced, even if the sample was randomized.

d. Source of other bias for Stanley 2015: A patients' ED visit in the 3 months before the intervention visit served as a comparison for the intervention visit.

e. Source of other bias for Stanley 2018: Comparison sites matched to intervention sites were identified after the intervention was integrated into clinical workflow at intervention sites.

**eTable 3.** Values used to calculate estimates of effect size

| <b>Author and Year</b>           |                              |                                                                              |                         |                                                                         |                           |                                                                                  |
|----------------------------------|------------------------------|------------------------------------------------------------------------------|-------------------------|-------------------------------------------------------------------------|---------------------------|----------------------------------------------------------------------------------|
| <b>Depression at follow-up</b>   | <b>Intervention <i>n</i></b> | <b>Intervention group depression score at follow-up (Standard Deviation)</b> | <b>Control <i>n</i></b> | <b>Control group depression score at follow-up (Standard Deviation)</b> | <b>Hedges' G (95% CI)</b> | <b>Study methods for obtaining outcome data</b>                                  |
| Armitage 2016 <sup>1</sup>       | 75                           | BDI: 16.65 (5.92)                                                            | 73                      | BDI: 17.78 (6.51)                                                       | .18 (-.14-.50)            | Patient self-report                                                              |
| Asarnow 2011 <sup>2</sup>        | 89                           | CESD: 24.6 (14.3)                                                            | 92                      | CESD: 22.7 (14.2)                                                       | -.13 (-.42-.16)           | Patient self-report                                                              |
| Currier 2010 <sup>5</sup>        | 58                           | HRSD: 37.49 (9.4)                                                            | 64                      | HRSD: 40.44 (10.34)                                                     | .30 (-.06-.65)            | Patient self-report                                                              |
| Grupp-Phelan 2019 <sup>6</sup>   | 80                           | CESD: 16.1 (10.6)                                                            | 79                      | CESD: 16.7 (11.4)                                                       | .33 (.03-3.23)            | Patient self-report                                                              |
| Grupp-Phelan 2012 <sup>7</sup>   | 13                           | CESD: 18.16 (6.5)                                                            | 11                      | CESD: 24.18 (13.2)                                                      | .57 (-.25-1.40)           | Patient and caregiver self-report                                                |
| King 2015 <sup>8</sup>           | 27                           | RADS-2 SF: 25.38 (4.7)                                                       | 22                      | RADS-2 SF: 30.87 (4.0)                                                  | 1.23 (.61-1.84)           | Patient self-report                                                              |
| <b>Linkage to follow-up care</b> | <b>Intervention <i>n</i></b> | <b>Intervention <i>n</i> with linkage to follow-up care</b>                  | <b>Control <i>n</i></b> | <b>Control <i>n</i> with linkage to follow-up care</b>                  | <b>OR (95% CI)</b>        | <b>Study methods for obtaining outcome data</b>                                  |
| Asarnow 2011 <sup>2</sup>        | 76                           | 70                                                                           | 84                      | 64                                                                      | 3.65 (1.38-9.65)          | Caregiver (or patient if caregiver unavailable) report                           |
| Currier 2010 <sup>5</sup>        | 56                           | 39                                                                           | 64                      | 19                                                                      | 5.43 (2.48-11.88)         | Medical record review                                                            |
| Grupp-Phelan 2019 <sup>6</sup>   | 80                           | 29                                                                           | 79                      | 22                                                                      | 1.47 (.75-2.88)           | Caregiver report                                                                 |
| Grupp-Phelan 2012 <sup>7</sup>   | 11                           | 7                                                                            | 13                      | 2                                                                       | 9.63 (1.38-67.25)         | Patient, caregiver and mental health agency report                               |
| Ougrin 2011 <sup>11</sup>        | 35                           | 29                                                                           | 35                      | 17                                                                      | 5.12 (1.70-15.39)         | Medical record review (and service manager report if medical record unavailable) |
| O'Connor 2018 <sup>10</sup>      | 23                           | 15                                                                           | 25                      | 8                                                                       | 3.98 (1.20-13.24)         | Patient self-report                                                              |

| <b>Linkage to follow-up care</b>  | <b>Intervention <i>n</i></b> | <b>Intervention <i>n</i> with linkage to follow-up care</b> | <b>Control <i>n</i></b> | <b>Control <i>n</i> with linkage to follow-up care</b> | <b>OR (95% CI)</b> | <b>Study methods for obtaining outcome data</b>           |
|-----------------------------------|------------------------------|-------------------------------------------------------------|-------------------------|--------------------------------------------------------|--------------------|-----------------------------------------------------------|
| Spirito 2002 <sup>12</sup>        | 29                           | 27                                                          | 34                      | 31                                                     | 1.30 (.20-8.41)    | Patient, caregiver and treatment provider report.         |
| Stanley 2015 <sup>13</sup>        | 96                           | 81                                                          | 96                      | 66                                                     | 2.45 (1.22-4.94)   | Medical record review                                     |
| Stanley 2018 <sup>14</sup>        | 1186                         | 1008                                                        | 454                     | 354                                                    | 1.6 (1.22-2.10)    | Medical record review                                     |
| <b>Subsequent suicide attempt</b> | <b>Intervention <i>n</i></b> | <b>Intervention <i>n</i> without subsequent SA</b>          | <b>Control <i>n</i></b> | <b>Control <i>n</i> without subsequent SA</b>          | <b>OR (95%) CI</b> | <b>Study methods for obtaining outcome data</b>           |
| Asarnow 2011 <sup>2</sup>         | 89                           | 85                                                          | 92                      | 87                                                     | 1.22 (.32-4.70)    | Patient (or caregiver if patient unavailable) self-report |
| Bryan 2017 <sup>3</sup>           | 33                           | 31                                                          | 32                      | 27                                                     | 2.87 (.51-16.01)   | Patient self-report                                       |
| Comtois 2019 <sup>4</sup>         | 329                          | 308                                                         | 328                     | 294                                                    | 1.70 (.96-2.99)    | Patient self-report                                       |
| Grupp-Phelan 2019 <sup>6</sup>    | 80                           | 77                                                          | 79                      | 78                                                     | .33 (.03-3.23)     | Patient self-report                                       |
| Miller 2017 <sup>9</sup>          | 501                          | 410                                                         | 497                     | 383                                                    | 1.33 (.97-1.80)    | Both patient self-report and medical record review        |
| O'Connor 2018 <sup>10</sup>       | 23                           | 21                                                          | 25                      | 23                                                     | .91 (.12-7.07)     | Patient self-report                                       |
| Stanley 2018 <sup>14</sup>        | 1186                         | 1150                                                        | 454                     | 430                                                    | 1.78 (1.05-3.02)   | Medical record review                                     |

Abbreviations:

BDI – Beck Depression Inventory

CESD – Center for Epidemiologic Studies – Depression Scale

CI – Confidence interval

HRSD – Hamilton Rating Scale for Depression

*n* – sample size

RADS-2 SF – Reynolds Adolescent Depression Scale, version 2, short form

SA – Suicide Attempt

## eReferences

1. Armitage CJ, Rahim WA, Rowe R, O'Connor RC. An exploratory randomised trial of a simple, brief psychological intervention to reduce subsequent suicidal ideation and behaviour in patients admitted to hospital for self-harm. *Br J Psychiatry*. 2016;208(5):470-476. doi:10.1192/bjp.bp.114.162495
2. Asarnow JR, Baraff LJ, Berk M, et al. An emergency department intervention for linking pediatric suicidal patients to follow-up mental health treatment. *Psychiatr Serv*. 2011;62(11):1303-1309.
3. Bryan CJ, Mintz J, Clemans TA, et al. Effect of crisis response planning vs. Contracts for safety on suicide risk in U.S. Army Soldiers: A randomized clinical trial. *J Affect Disord*. 2017;212:64-72. doi:http://dx.doi.org/10.1016/j.jad.2017.01.028
4. Comtois KA, Kerbrat AH, Decou CR, et al. Effect of Augmenting Standard Care for Military Personnel With Brief Caring Text Messages for Suicide Prevention: A Randomized Clinical Trial. *JAMA Psychiatry*. 2019;76(5):474-483.
5. Currier GW, Fisher SG, Caine ED. Mobile Crisis Team Intervention to Enhance Linkage of Discharged Suicidal Emergency Department Patients to Outpatient Psychiatric Services: A Randomized Controlled Trial. *Acad Emerg Med*. 2010;17(1):36-43. doi:10.1111/j.1553-2712.2009.00619.x
6. Grupp-Phelan J, Stevens J, Boyd S, et al. Effect of a Motivational Interviewing-Based Intervention on Initiation of Mental Health Treatment and Mental Health after an Emergency Department Visit Among Suicidal Adolescents. *JAMA Network Open*. 2019;2(12):e1917941. Doi:10.1001/jamanetworkopen.2019.17941.
7. Grupp-Phelan J, McGuire L, Husky MM, Olfson M. A Randomized Controlled Trial to Engage in Care of Adolescent Emergency Department Patients With Mental Health Problems That Increase Suicide Risk. *Pediatr Emerg Care*. 2012;28(12):1263-1268. doi:10.1097/PEC.0b013e3182767ac8
8. King CA, Gipson PY, Horwitz AG, Opperman KJ. Teen Options for Change: An Intervention for Young Emergency Patients Who Screen Positive for Suicide Risk. *Psychiatr Serv*. 2015;66(1):97-100. doi:10.1176/appi.ps.201300347
9. Miller IW, Camargo Jr CA, Arias SA, et al. Suicide Prevention in an Emergency Department Population: The ED-SAFE Study. *JAMA Psychiatry*. 2017;74(6):563-570. doi:10.1001/jamapsychiatry.2017.0678
10. O'Connor SS, Mcclay MM, Choudhry S, et al. Pilot randomized clinical trial of the Teachable Moment Brief Intervention for hospitalized suicide attempt survivors. *Gen Hosp Psychiatry*. 2018;(July):0-1. doi:10.1016/j.genhosppsy.2018.08.001
11. Ougrin D, Zundel T, Ng A, Banarsee R, Bottle A, Taylor E. Trial of Therapeutic Assessment in London: randomised controlled trial of Therapeutic Assessment versus standard psychosocial assessment in adolescents presenting with self-harm. *Arch Dis Child*. 2011;96(2):148-153. doi:10.1136/ADC.2010.188755
12. Spirito A, Boergers J, Donaldson D, Bishop D, Lewander W. An Intervention Trial to Improve Adherence to Community Treatment by Adolescents After a Suicide Attempt. *J Am Acad Child Adolesc Psychiatry*. 2002;41(4):435-442. doi:10.1097/00004583-200204000-00016
13. Stanley B, Brown GK, Currier GW, Lyons C, Chesin M, Knox KL. Brief intervention and follow-up for suicidal patients with repeat emergency department visits enhances treatment engagement. *Am J Public Health*. 2015;105(8):1570-1572.
14. Stanley B, Brown GK, Brenner LA, et al. Comparison of the Safety Planning Intervention With Follow-up vs Usual Care of Suicidal Patients Treated in the Emergency Department. *JAMA Psychiatry*. 2018;75(9):894. doi:10.1001/jamapsychiatry.2018.1776
